# Supplementary material for: Inhibition of miR-937-3p by targeting SNCB ameliorates rotenone-induced toxicity in SH- SY5Y cells by reducing alpha-synuclein aggregation and apoptosis
Source: Research Square preprint supplement (doi:10.21203/rs.3.rs-6763797/v1), 2025-06-03
Supplement: Supplementary file 1 [file 6477f34f23a3dda3e8632b90.pdf]

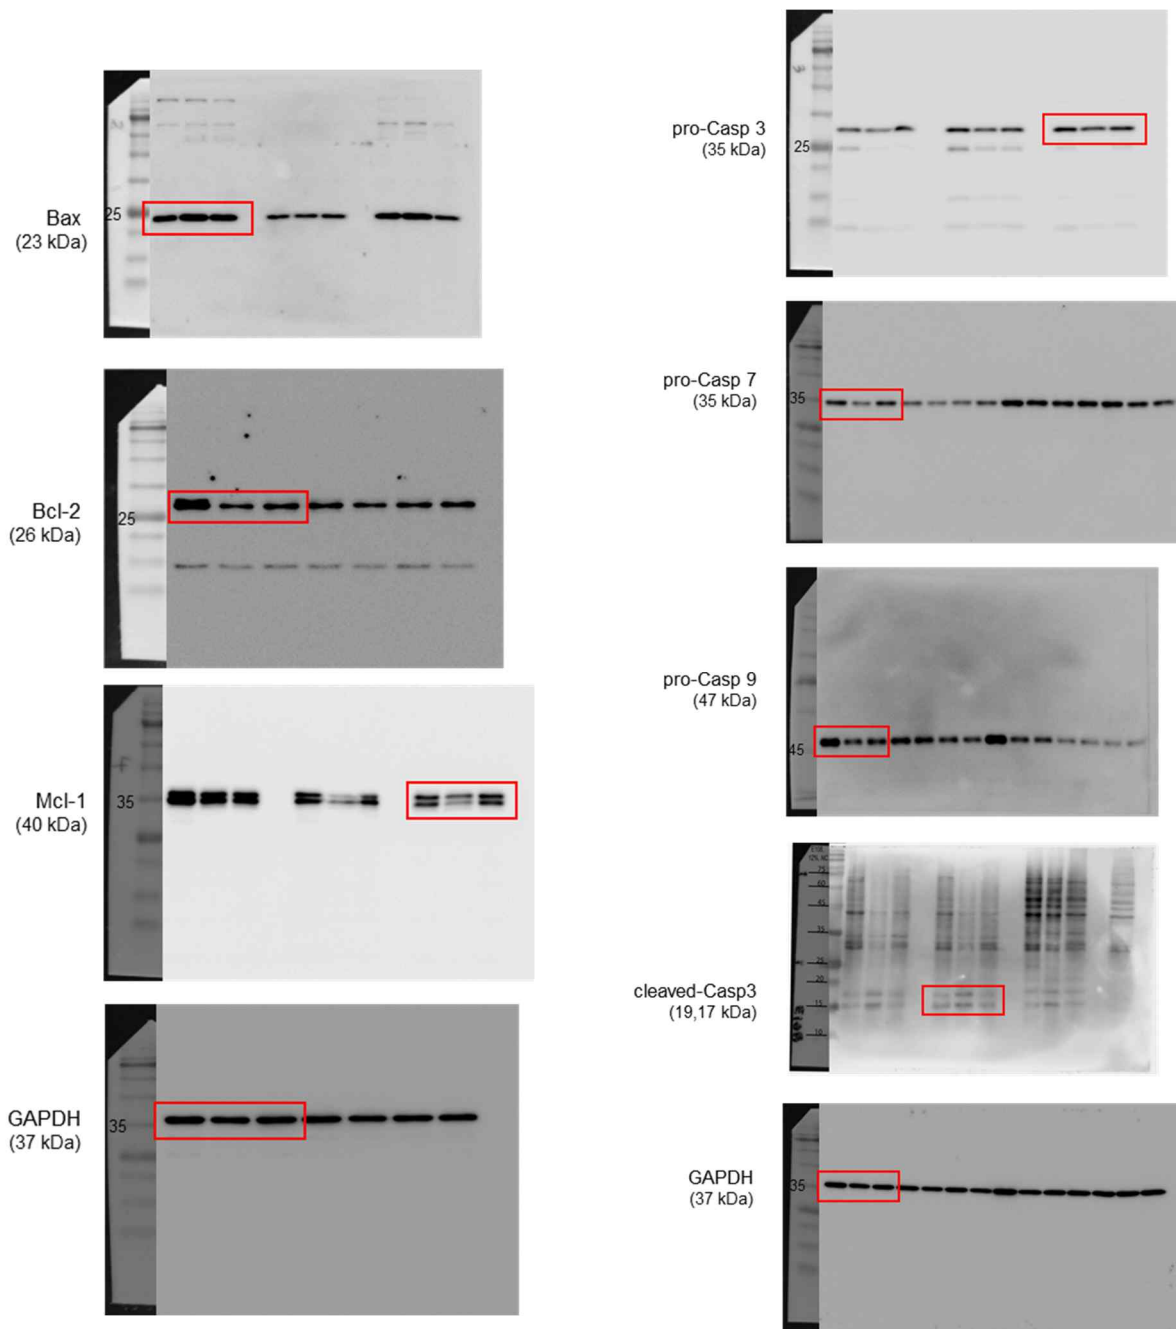

**Figure S5.** Original western blotting analysis image in **Fig. 3** of this manuscript.

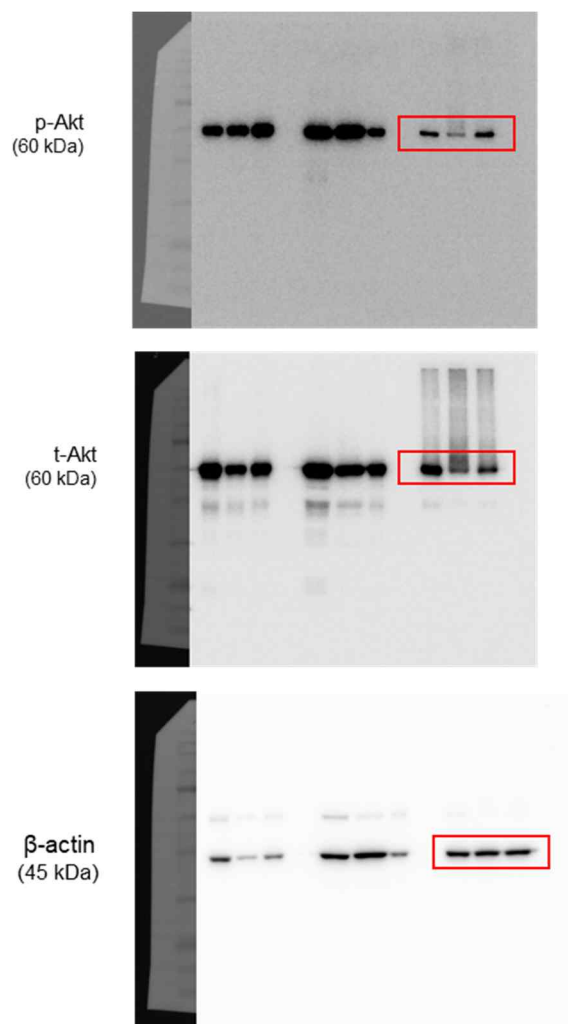

**Figure S6.** Original western blotting analysis image in **Fig. 4** of this manuscript.

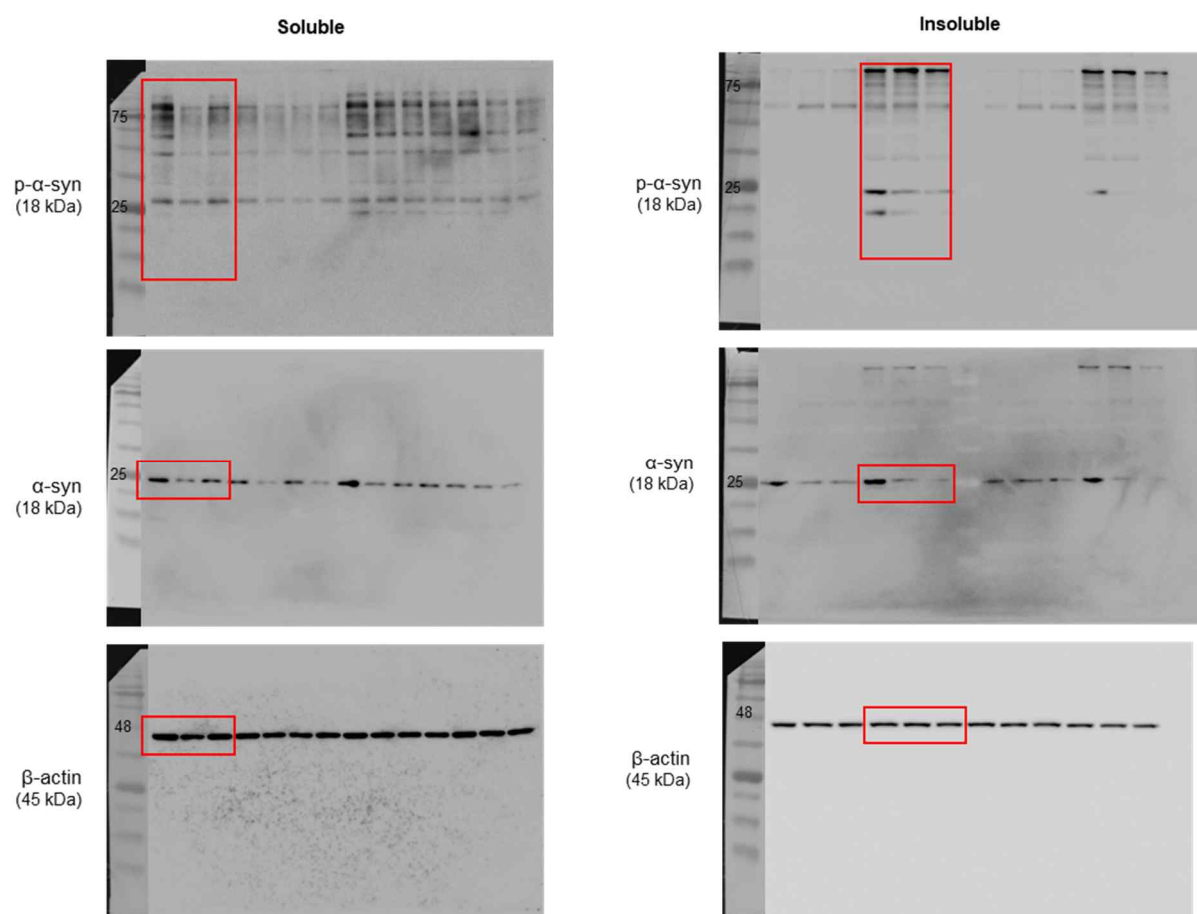

**Figure S7.** Original western blotting analysis image in **Fig. 5** of this manuscript.

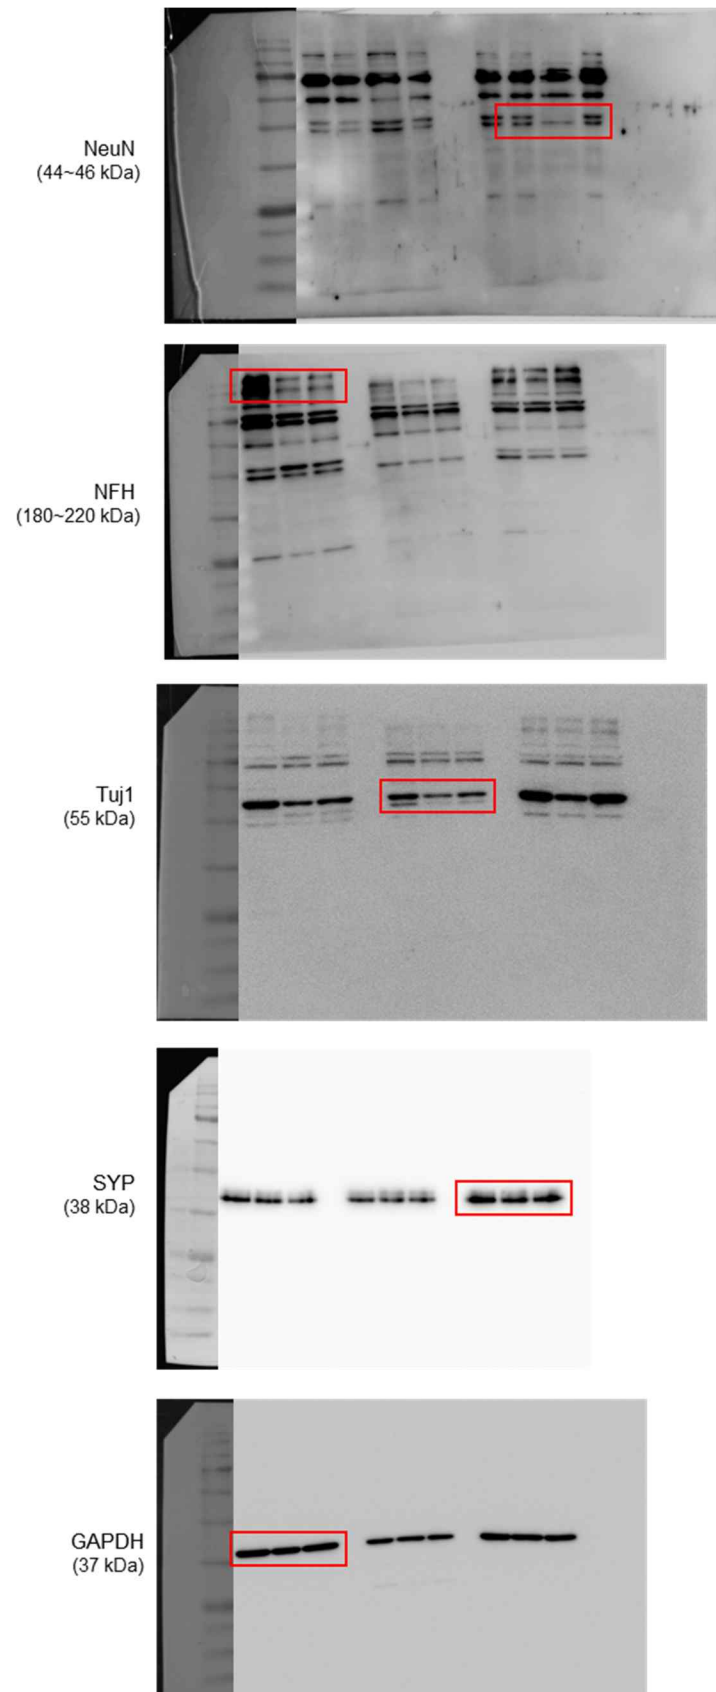

**Figure S8.** Original western blotting analysis image in **Fig. 6** of this manuscript.
