# Supplementary material for: Inhibition of miR-937-3p by targeting SNCB ameliorates rotenone-induced toxicity in SH- SY5Y cells by reducing alpha-synuclein aggregation and apoptosis
Source: Research Square preprint supplement (doi:10.21203/rs.3.rs-6763797/v1), 2025-06-03
Supplement: Supplementary file 1 [file 99136fb7f7280213df65c79b.docx]

Inhibition of miR-937-3p by targeting SNCB ameliorates rotenone-induced toxicity in SH-SY5Y cells by reducing alpha-synuclein aggregation and apoptosis

Haewon Jeong 1,2,!, Mahesh Ramalingam 1,!, Jiyun Choi 1, Jinsu Hwang 1,3, Geupil Jang 4,*, Hyong-Ho Cho 5, Byeong C. Kim 6, Sujeong Jang 1,2,* and Han-Seong Jeong 1,2,*

1 Department of Physiology, Chonnam National University Medical School, Hwasun 58128, Jeollanam-do, Republic of Korea; haewon258@gmail.com (H.J.); jiyunchoi10@gmail.com (J.C.); wlstn0128@naver.com (J.H.); melanimahesh@gmail.com (M.R.)

2 STEMCELL BIO Incorporation, Hwasun 58128, Jeollanam-do, Republic of Korea

3 Healthcare Advanced Chemical Research Institute, Korea Testing and Research Institute (KTR), Hwasun 58141, Jeollanam-do, Republic of Korea

4 School of Biological Sciences and Technology, Chonnam National University, Gwangju 61186, Republic of Korea; y3k@jnu.ac.kr (G.J.)

5 Department of Otolaryngology-Head and Neck Surgery, Chonnam National University Hospital, Chonnam National University Medical School, Gwangju 61469, Republic of Korea; victocho@hanmail.net (H.-H.C.)

6 Department of Neurology, Chonnam National University Hospital, Chonnam National University Medical School, Gwangju 61469, Republic of Korea; byeckim@gmail.com (B.C.K.)

!Equally contributed

***** Correspondence: sujeong.jjang@gmail.com (S.J.); jhsjeong@hanmail.net (H.-S.J.); yk3@jnu.ac.kr (G.J.)


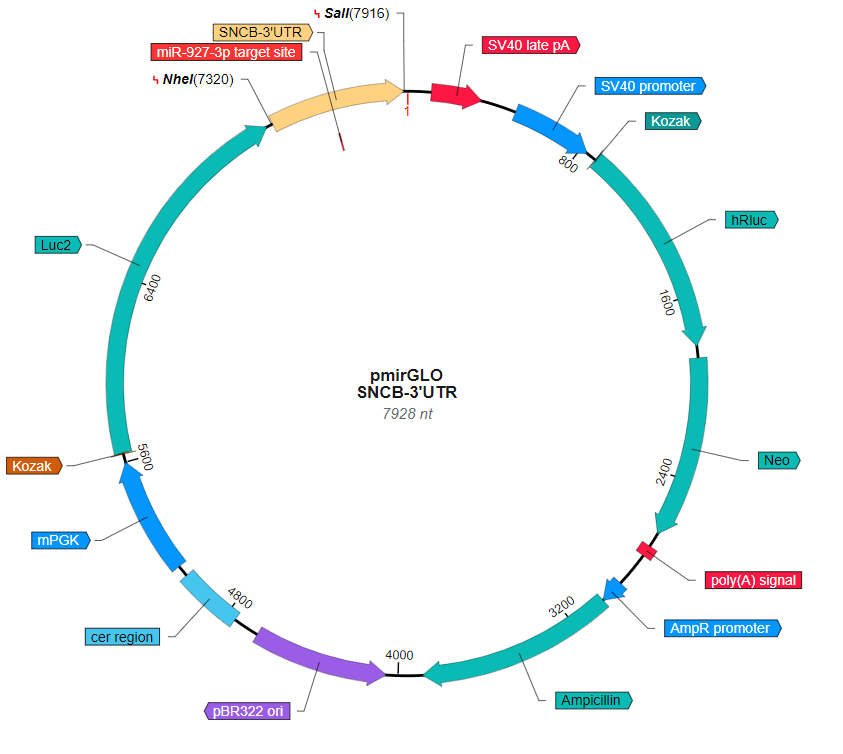


**Figure S1.** Plasmid vector map, including the WT-SNCB 3'-UTR used in the luciferase assay.


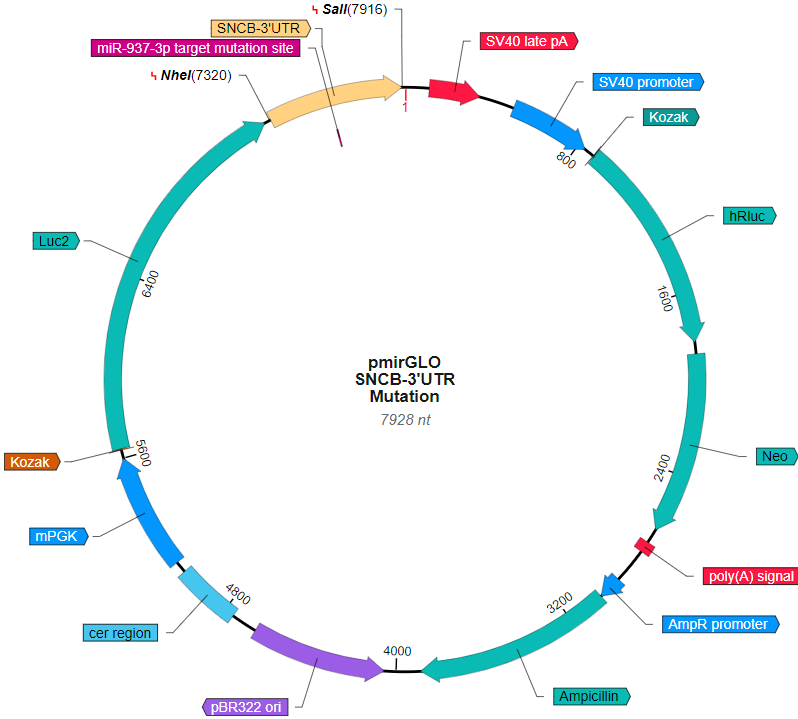


**Figure S2.** Plasmid vector map, including the Mut-SNCB 3'-UTR used in the luciferase assay.


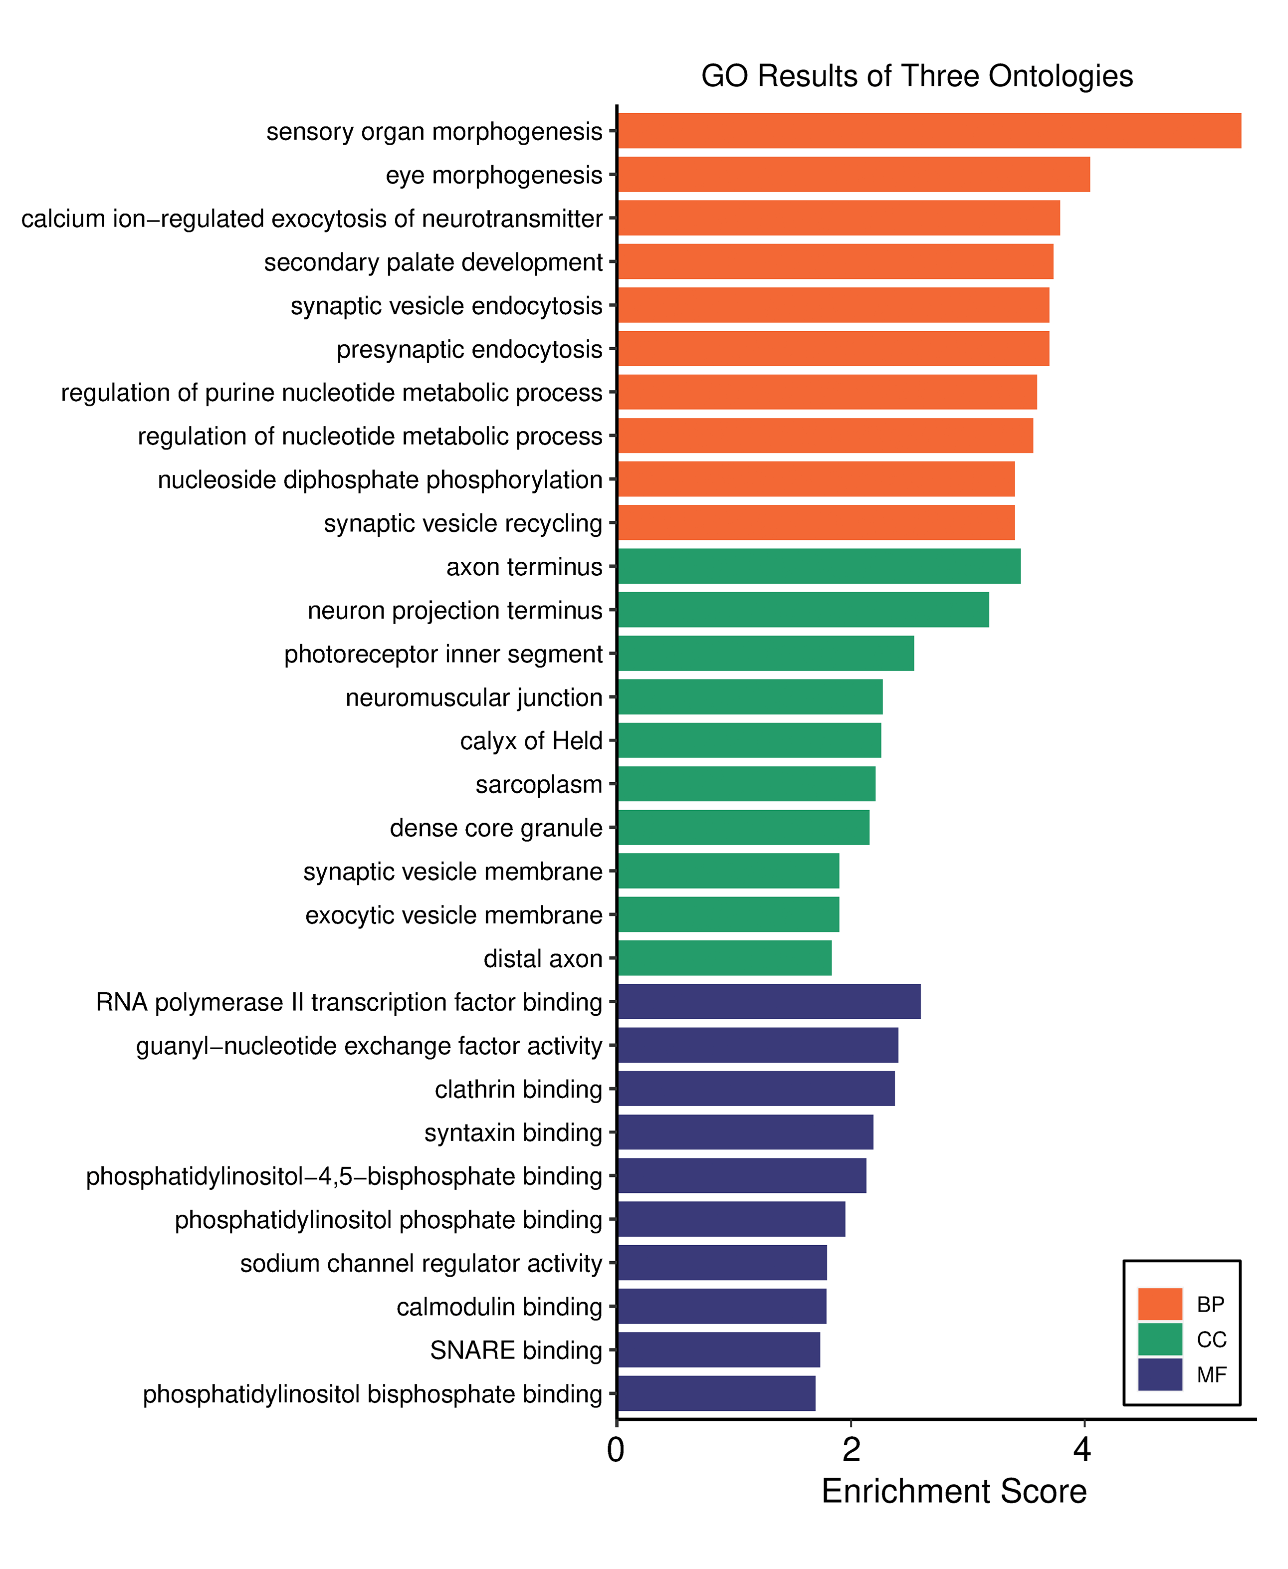


**Figure S3**. Gene Ontology analysis of 94 target proteins from three databases: TargetScan, miRWalk, and miRmap. BP, Biological process, orange color bar; CC, Cellular component, green color bar; MF, Molecular function, blue color bar.


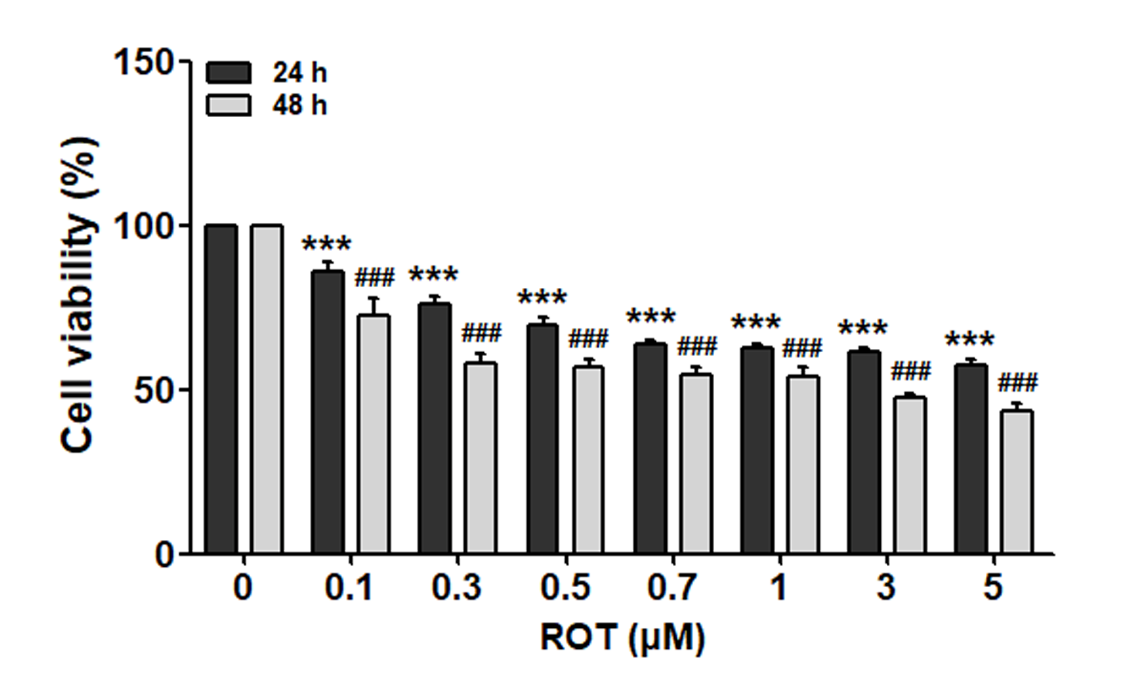


**Figure S4**. Cell viability test at different rotenone concentrations. Cells were incubated with different concentrations of ROT (0, 0.1, 0.3, 0.5, 0.7, 1, 3, and 5 μM) for 24 or 48 h and subjected to a CCK-8 assay. Data are presented as the mean ± SEM with n=4 and analyzed through one-way ANOVA followed by Bonferroni post hoc test. Statistical significance: *** *p* < 0.001 compared with 0 μM ROT group for 24 h; ### *p* < 0.001 compared with 0 μM ROT group for 48 h.


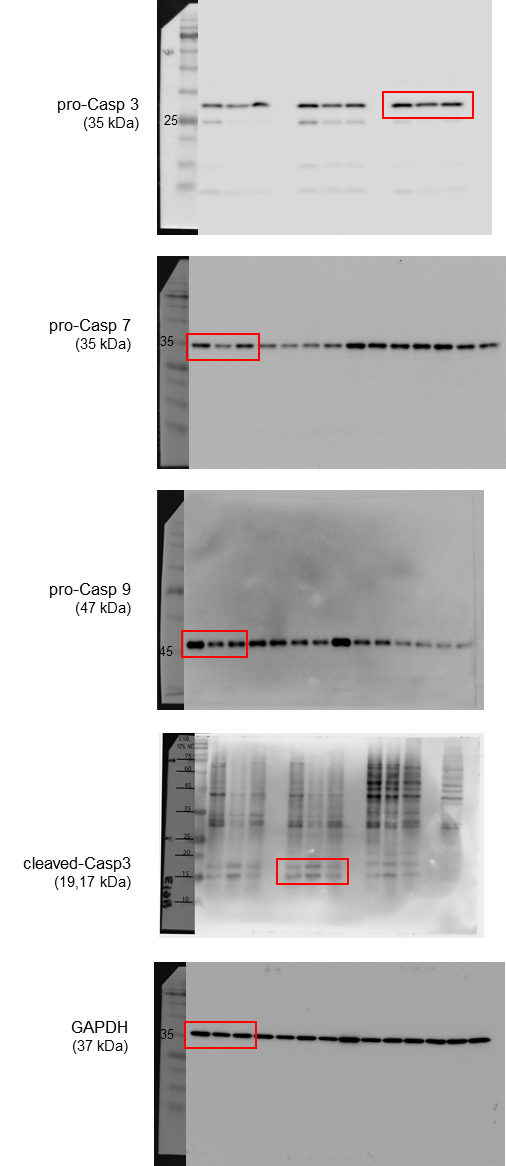


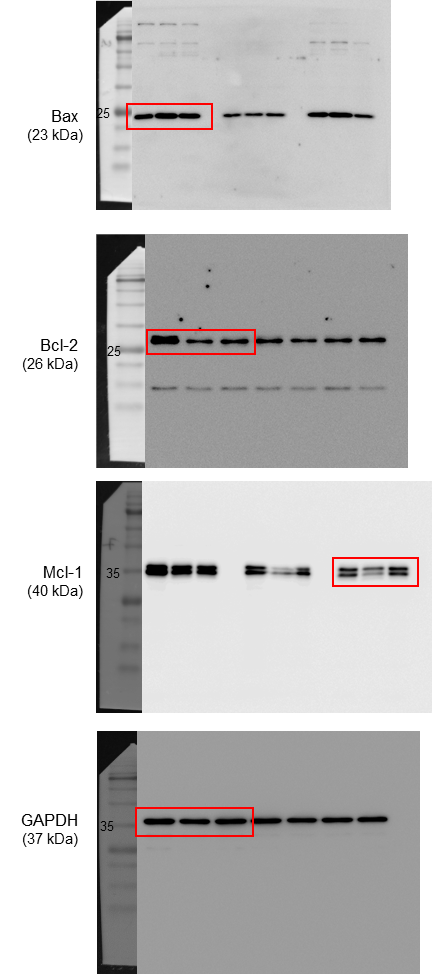


**Figure S5**. Original western blotting analysis image in **Fig. 3** of this manuscript.


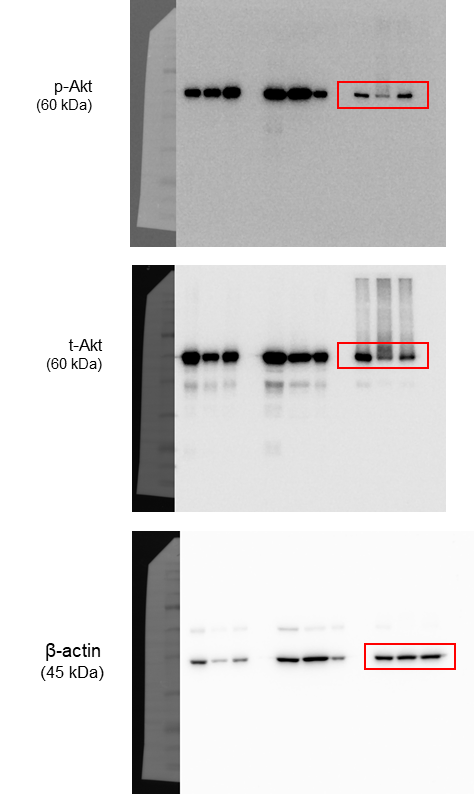


**Figure S6**. Original western blotting analysis image in **Fig. 4** of this manuscript.


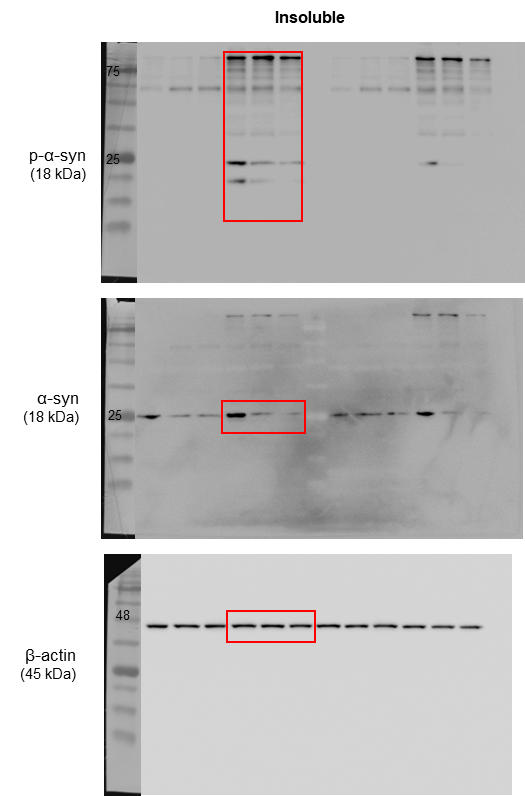


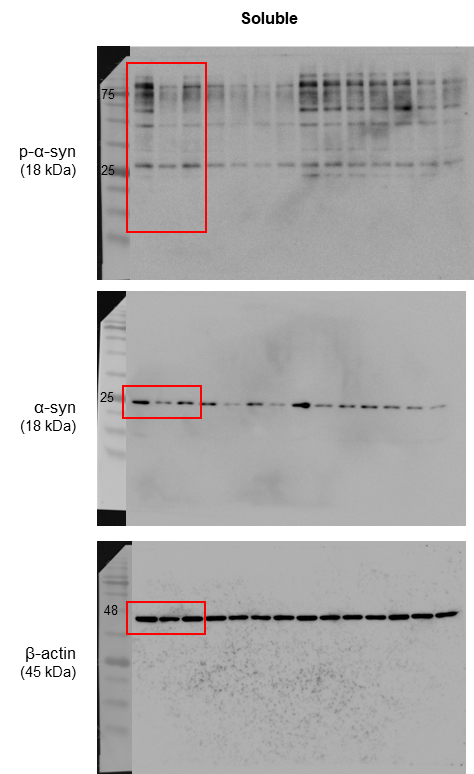


**Figure S7**. Original western blotting analysis image in **Fig. 5** of this manuscript.


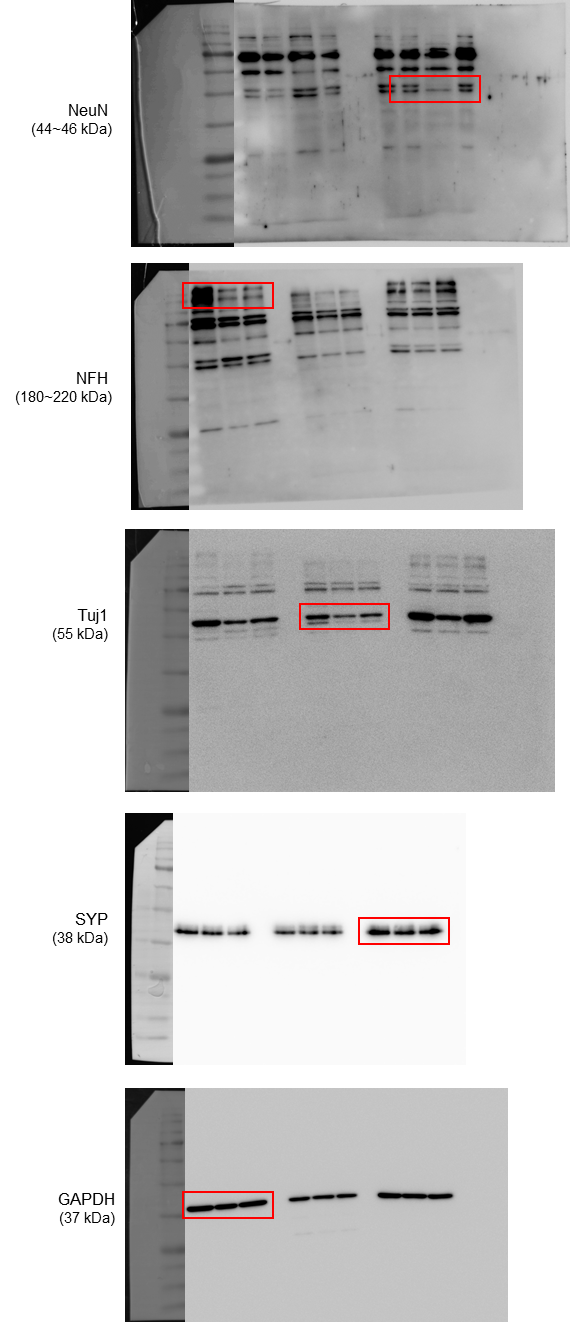


**Figure S8**. Original western blotting analysis image in **Fig. 6** of this manuscript.
